# Supplementary material for: Exploring Injury Profiles in Professional Football: Evidence from a Five-Year Study and the Role of the Functional Movement Screen
Source: Research Square preprint supplement (doi:10.21203/rs.3.rs-5775124/v1), 2025-05-02
Supplement: Supplementary file 1 [file 8c84381b7703a2df4eca9d1f.xlsx]

## Sheet: Sayfa1
Sporcu Adı	yaş	boy	kilo	fms skor	asimetri	yaralanma yeri	yaralanma durumu	kaçırılan antreman gün sayısı
1	26	1.93	81	16	0	bel	yaralanma var	4
2	31	1.74	79	17	0	hamstring total rüptür, groin	yaralanma var	65
3	33	1.86	80	18	0	adduktor	yaralanma var	10
4	25	1.76	75	16	0	groin	yaralanma var	18
5	33	1.86	80	14	2	diz, groin, hamstring	yaralanma var	25
6	20	1.81	80	17	0	yaralanma yok	yaralanma yok	0
7	28	1.84	76	16	0	calf- hamstring- rektus (3)	yaralanma var	86
8	24	1.83	77	17	0	hamstring	yaralanma var	5
9	21	1.74	71	16	0	yaralanma yok	yaralanma yok	0
10	28	1.76	75	17	0	yaralanma yok	yaralanma yok	0
11	26	1.75	76	16	0	hamstring	yaralanma var	8
12	27	1.77	76	17	0	hamstring	yaralanma var	80
13	29	1.82	78	16	1	hamstring	yaralanma var	50
14	23	1.72	75	16	0	yaralanma yok	yaralanma yok	0
15	24	1.87	77	16	1	hamstrşing, quadricesp, bel	yaralanma var	40
16	19	1.81	74	16	1	yaralanma yok	yaralanma yok	0
17	35	1.88	80	15	0	calf	yaralanma var	21
18	29	1.76	76	16	1	aşil tendinit, quadriceps grade 2, hamstring grade 2	yaralanma var	24
19	29	1.76	74	16	1	yaralanma yok	yaralanma yok	0
20	23	1.73	68	16	0	yaralanma yok	yaralanma yok	0
21	31	1.86	79	16	1	yaralanma yok	yaralanma yok	0
22	25	1.8	72	0	0	yaralanma yok	yaralanma yok	30
23	28	1.78	78.5	18	0	ayak bileği ve calf	yaralanma var	12
24	25	1.77	79.6	16	1	hamstring	yaralanma var	18
25	34	1.83	80	18	0	quadriceps darbe, servikal, hamstring	yaralanma var	38
26	23	1.89	76	16	0	hamstring	yaralanma var	4
27	26	1.84	78	16	1	ayak bileği	yaralanma var	60
28	32	1.85	79	17	0	parmak kırığı ve calf ve bel	yaralanma var	40
29	26	1.74	81	15	1	hamstring	yaralanma var	35
30	22	1.7	68	16	0	hamstring groin	yaralanma var	28
31	27	1.86	78	17	0	yaralanma yok	yaralanma yok	0
32	28	1.95	84	16	1	ayak bileği - hamstring, diz, bel	yaralanma var	51
33	27	1.93	81	17	0	yaralanma yok	yaralanma yok	0
34	34	1.86	80	17	0	calf	yaralanma var	6
35	34	1.86	80	12	3	yaralanma yok	yaralanma yok	0
36	29	1.76	79.5	18	0	yaralanma yok	yaralanma yok	0
37	28	1.8	79.6	17	0	yaralanma yok	yaralanma yok	0
38	21	1.81	79.8	17	0	groin ve hamstring, rektus	yaralanma var	150
39	25	1.83	81.5	16	0	yaralanma yok	yaralanma yok	0
40	20	1.83	85.9	16	1	ayak bileği	yaralanma var	8
41	27	1.79	75	16	1	calf	yaralanma var	55
42	29	1.76	75	17	0	ayak bileği, hamstring, calf	yaralanma var	32
43	27	1.75	76	16	0	groin	yaralanma var	8
44	25	1.78	75	16	0	yaralanma yok	yaralanma yok	0
45	25	1.87	76	18	1	quadriceps	yaralanma var	50
46	20	1.81	74	15	0	yaralanma yok	yaralanma yok	0
47	28	1.81	79	15	1	diz	yaralanma var	30
48	25	1.94	80.9	16	0	mcl	yaralanma var	8
49	27	1.83	78	16	0	ayak bileği darbesi	yaralanma var	10
50	27	1.83	80	16	0	quadriceps, kalaf	yaralanma var	27
51	24	1.73	68	16	0	hamstring, kalaf	yaralanma var	4
52	32	1.86	79	16	0	çene kırığı	yaralanma var	51
53	29	1.78	78.5	18	0	calf, hamstring	yaralanma var	18
54	18	1.91	75	17	0	yaralanma yok	yaralanma yok	0
55	26	1.77	79.6	17	1	hamstring, calf	yaralanma var	20
56	26	1.89	80	19	0	yaralanma yok	yaralanma yok	0
57	26	1.87	79	15	0	hamstring	yaralanma var	16
58	28	1.88	76	17	0	yaralanma var	yaralanma var	102
59	27	1.83	79.5	17	2	ayak kırık ağustos	yaralanma var	280
60	21	1.75	70.4	15	1	yaralanma yok	yaralanma yok	0
61	27	1.84	78	15	1	groin	yaralanma var	4
62	33	1.85	79	16	0	bel hamstring	yaralanma var	21
63	28	1.86	81.6	16	0	hamstring	yaralanma var	41
64	31	1.75	75	16	0	hamstring	yaralanma var	10
65	30	1.83	77	16	1	quadriceps	yaralanma var	24
66	18	1.87	80	15	0	Adduktor	yaralanma var	0
67	35	1.86	80	16	0	Alt Adale, tenis leg, groin	yaralanma var	48
68	17	1.79	69.2	14	1	Hamstrig	yaralanma var	4
69	35	1.86	80	13	1	Alt Adale	yaralanma var	26
70	30	1.76	79.5	16	0	Hamstrig	yaralanma var	0
71	29	1.8	79.6	17	0	Adduktor, Hamstring, Pelvis	yaralanma var	6
72	22	1.81	79.8	16	1	Quadriceps, Tfl , Ayak Bileği	yaralanma var	28
73	26	1.83	81.5	15	0	Adduktor, Bel	yaralanma var	6
74	26	1.83	85.9	15	1	Tibial Stres Send. , Alt Adale,	yaralanma var	6
75	29	1.91	80	15	1	Bel, Sırt, Pelvis	yaralanma var	10
76	30	1.85	81	15	0	Menisküs	yaralanma var	30
77	30	1.76	75	16	0	Hamstrig, Boyun	yaralanma var	8
78	26	1.87	76	14	1	Bel, Alt Adale	yaralanma var	50
79	21	1.81	74	17	0	Aşil Tendon, Adduktor, Hamstring	yaralanma var	0
80	37	1.88	80	15	0	aşil tendinii	yaralanma var	14
81	26	1.94	80.9	18	1	Diz, Hamstring, Bel	yaralanma var	14
82	33	1.86	79	17	0	MCL	yaralanma var	30
83	27	1.8	79.3	15	1	Ayak Bileği, Hamstring	yaralanma var	0
84	28	1.86	72	17	1	menisektomi	yaralanma var	50
85	30	1.78	78.5	18	0	Alt Adale, Bel, Adduktor	yaralanma var	4
86	27	1.77	79.6	15	0	Hamstring, quadriceps	yaralanma var	31
87	29	1.76	68.4	0	0	Ayak Kırık ve hamstring grade 3	yaralanma var	264
88	29	1.88	76	17	0	Menisektomi	yaralanma var	50
89	25	1.89	78	18	0	Mcl, Ayak Bileği	yaralanma var	28
90	28	1.83	79.5	16	0	diz, groin, kalça	yaralanma var	21
91	22	1.75	70.4	15	0	Hamstring, Adduktor, Pelvis	yaralanma var	0
92	28	1.84	78	16	1	Alt Adale, Hamstring, Tfl ve groin	yaralanma var	92
93	34	1.85	79	17	1	Bel, Quadriceps, Hamstring, aşil tendini	yaralanma var	18
94	31	1.85	81	16	1	hamstring	yaralanma var	30
95	29	1.86	81.6	16	1	Psoas, Costal	yaralanma var	21
96	29	1.81	81	18	0	Ayak Bileği, calf	yaralanma var	12
97	36	1.86	80	16	2	calf ve burun kırılması	yaralanma var	40
98	18	1.79	69.2	14	0	kalf	yaralanma var	4
99	36	1.86	80	13	0	groin,	yaralanma var	14
100	31	1.76	79.5	18	0	diz kondromoalizi	yaralanma var	14
101	30	1.8	79.6	17	3	hamstring, groin	yaralanma var	27
102	24	1.81	79.8	16	0	sol quadriceps	yaralanma var	4
103	29	1.89	78	16	0	MCL	yaralanma var	28
104	27	1.83	81.5	17	0	boyun spazm , grip, ayak bileği	yaralanma var	4
105	22	1.83	85.9	17	2	ayak bileği burkulma, bel, sağ kalf	yaralanma var	18
106	30	1.91	80	15	2	bel opere	yaralanma var	25
107	31	1.85	81	15	0	yaralanma yok	yaralanma yok	0
108	31	1.76	75	15	0	omuz ağrısı, kasık fıtığı	yaralanma var	21
109	30	1.8	77	18	0	diz	yaralanma var	14
110	27	1.87	76	14	1	kalf, groin, diz	yaralanma var	12
111	32	1.79	78	17	0	ayak bileği burkulma	yaralanma var	9
112	31	1.92	84.9	17	0	aşil tendinit ve kas (hamstring)	yaralanma var	50
113	27	1.94	80.9	17	0	bel ve hamstring, pelvis	yaralanma var	28
114	23	1.72	71.4	17	0	rektus kopma	yaralanma var	72
115	29	1.86	79.3	15	1	diz	yaralanma var	14
116	25	1.85	72	17	0	yaralanma yok	yaralanma yok	0
117	31	1.78	78.5	17	0	yaralanma yok	yaralanma yok	0
118	20	1.91	75.9	18	1	costal darbe	yaralanma var	4
119	28	1.77	79.6	15	0	groin, hamstring	yaralanma var	4
120	30	1.76	68.4	15	0	hamstring ayak	yaralanma var	34
121	30	1.88	76	17	1	yaralanma yok	yaralanma yok	0
122	29	1.83	79.5	17	1	pupis	yaralanma var	21
123	23	1.75	70.4	15	0	groin, hamstring , quadriceps	yaralanma var	12
124	29	1.84	78	16	0	diz ayak bileği	yaralanma var	14
125	27	1.85	76.3	17	0	hamstring	yaralanma var	9
126	35	1.85	84.2	17	1	bel hamstring	yaralanma var	18
127	30	1.86	78.1	18	0	hamstring	yaralanma var	14
128	32	1.85	81	16	0	bel, diz, hamstring, aşil	yaralanma var	54
129	30	1.86	81.6	16	1	ACL ve costal groin kas	yaralanma var	50
130	30	1.81	81	18	1	yaralanma yok	yaralanma yok	0
131	28	1.83	70	16	0	rectus	yaralanma var	10
132	27	1.89	89.7	16	0	yaralanma yok	yaralanma yok	0
133	24	1.84	81.9	17	0	groin ve hamstirng	yaralanma var	37
134	27	1.86	82.6	15	0	quadriceps	yaralanma var	46
135	19	1.79	69.2	14	0	yaralanma yok	yaralanma yok	0
136	19	1.79	70	16	0	yaralanma yok	yaralanma yok	0
137	37	1.86	80	13	1	diz, groin kas	yaralanma var	21
138	31	1.8	79.6	17	0	hamstirng ve ACL	yaralanma var	198
139	27	1.91	86.4	14	1	yaralanma yok	yaralanma yok	0
140	24	1.81	80	17	0	rektus ve hamstrin	yaralanma var	45
141	32	1.89	79.5	19	1	rectus yırtılması, groin, bel	yaralanma var	52
142	26	1.83	81.8	16	0	adduktor	yaralanma var	28
143	22	1.76	75	14	1	yaralanma yok	yaralanma yok	0
144	33	1.89	83.8	14	1	hasmtring uyluk gerilmeis	yaralanma var	28
145	23	1.87	84	14	1	ayak bileği burkulması, covid	yaralanma var	16
146	27	1.94	85.3	12	1	diz ACL öyküsü	yaralanma var	14
147	31	1.8	76.5	18	0	hamstring	yaralanma var	10
148	33	1.9	80.8	16	0	kas yaralanması (hamstring) ve diz	yaralanma var	58
149	29	1.83	84.9	16	0	diz	yaralanma var	20
150	25	1.74	72	15	1	diz ve hamstring	yaralanma var	8
151	26	1.84	74.7	17	0	groin ve hamstring covid	yaralanma var	58
152	32	1.92	84.9	16	1	ACL	yaralanma var	200
153	28	1.94	80	17	0	mcl	yaralanma var	14
154	24	1.72	73.2	15	1	hamstring	yaralanma var	37
155	29	1.84	80.5	12	0	diz menisküs ameliyatı	yaralanma var	62
156	30	1.86	72	15	1	yaralanma yok	yaralanma yok	0
157	32	1.78	78.5	18	0	yaralanma yok	yaralanma yok	0
158	21	1.91	75.9	14	0	diz	yaralanma var	10
159	29	1.77	79.6	14	1	diz, karın kası yırtığı ve hamstring, groin, kovid (6)	yaralanma var	75
160	31	1.75	68.4	14	1	hamstring ve bel, ayak bileği	yaralanma var	40
161	30	1.83	79.5	17	1	osteotis pupis, groin	yaralanma var	14
162	27	1.76	75.9	16	1	menisküs operasyaonu ve ayak bileği burkulma	yaralanma var	54
163	24	1.73	70.4	14	0	hamstring	yaralanma var	21
164	30	1.84	78	17	1	hamstring	yaralanma var	12
165	31	1.87	77.6	19	0	groin	yaralanma var	30
166	18	1.76	69	16	1	diz	yaralanma var	30
167	33	1.85	81	14	1	hamstring ve diz	yaralanma var	53
168	31	1.86	82.8	11	0	quadriceps acl reh	yaralanma var	155
169	25	1.78	73.5	17	0	quadricesp	yaralanma var	10
